# Supplementary material
Source: PubMed Central journal article supplement (PMC7371484)
Supplement: gutjnl-2020-322118supp001.pdf [file gutjnl-2020-322118supp001.pdf]

**SUPPLEMENTARY TABLES:**

Supplementary Table 1: Chest imaging for three groups

|                                       | COVID-19 alone (n=108) | Cirrhosis+COVID-19 (n=37) | Cirrhosis alone (n=127) | P-value for all three groups |
|---------------------------------------|------------------------|---------------------------|-------------------------|------------------------------|
| <b>Chest X ray (done in everyone)</b> |                        |                           |                         |                              |
| Normal                                | 9                      | 4                         | 32                      | <0.0001                      |
| Bilateral Ground glass opacities      | 33                     | 11                        | 7                       | <0.0001                      |
| Bilateral Ground glass consolidation  | 5                      | 1                         | 2                       | 0.38                         |
| Pneumonia                             | 46                     | 11                        | 11                      | <0.0001                      |
| Pulmonary Edema                       | 14                     | 4                         | 8                       | 0.21                         |
| Pleural effusion                      | 12                     | 6                         | 19                      | 0.61                         |
| <b>CT Scan</b>                        | COVID-19 alone (n=57)  | Cirrhosis+COVID-19 (n=21) | Cirrhosis alone (n=56)  |                              |
| Normal                                | 0                      | 0                         | 2                       |                              |
| Bilateral Ground glass opacities      | 23                     | 7                         | 9                       | 0.006                        |
| Bilateral Ground glass consolidation  | 6                      | 2                         | 2                       | 0.23                         |
| Pneumonia                             | 19                     | 6                         | 7                       | 0.01                         |
| Pulmonary Edema                       | 2                      | 3                         | 4                       | 0.25                         |
| Pleural effusion                      | 6                      | 2                         | 15                      | 0.18                         |

Data presented as raw numbers; Kruskal-Wallis, Chi-square tests or ANOVA as appropriate. There could be more than one finding per imaging, which is why the numbers do not add up to the total above.

Supplementary Table 2: Medications used for COVID-19 patients

|                                   | COVID-19 alone (n=108) | COVID-19 +Cirrhosis (n=37) |
|-----------------------------------|------------------------|----------------------------|
| <b>Antibiotics</b>                |                        |                            |
| Beta lactams                      | 45                     | 11                         |
| Fluoro quinolones                 | 3                      | 2                          |
| Zosyn/Timentin/Augmentin          | 7                      | 4                          |
| Clindamycin                       | 3                      | 1                          |
| Vancomycin                        | 14                     | 9                          |
| Daptomycin                        | 0                      | 0                          |
| Macrolides                        | 22                     | 10                         |
| Tetracyclines                     | 23                     | 2                          |
| Anti-fungal                       | 4                      | 1                          |
| Imipenem/Meropenem/Ertapenem      | 4                      | 0                          |
| Metronidazole                     | 3                      | 0                          |
| Linezolid                         | 1                      | 0                          |
| Others                            | 5                      | 6                          |
| <b>Non-antibiotic medications</b> |                        |                            |
| NSAIDs                            | 5                      | 0                          |
| Acetaminophen                     | 65                     | 19                         |
| Chloroquine/Hydroxychloroquine    | 46                     | 11                         |
| Tocilizumab                       | 12                     | 9                          |
| Lopinavir/Ritonavir               | 1                      | 0                          |
| Remdesivir                        | 2                      | 1                          |
| Sarilumab                         | 1                      | 1                          |
| <b>Clinical Trials</b>            |                        |                            |
| Enrolled in Clinical trial*       | 46                     | 8                          |

Data presented as raw numbers; \*:p<0.05 between the 2 groups ; none of the other comparisons were significant. Comparisons were performed using Chi-square tests.
